# Supplementary material for: Tumor cell integrin β4 and tumor stroma E-/P-selectin cooperatively regulate tumor growth in vivo
Source: PubMed Central journal article supplement (PMC10022201; doi:10.1186/s13045-023-01413-9), 2023-03-17

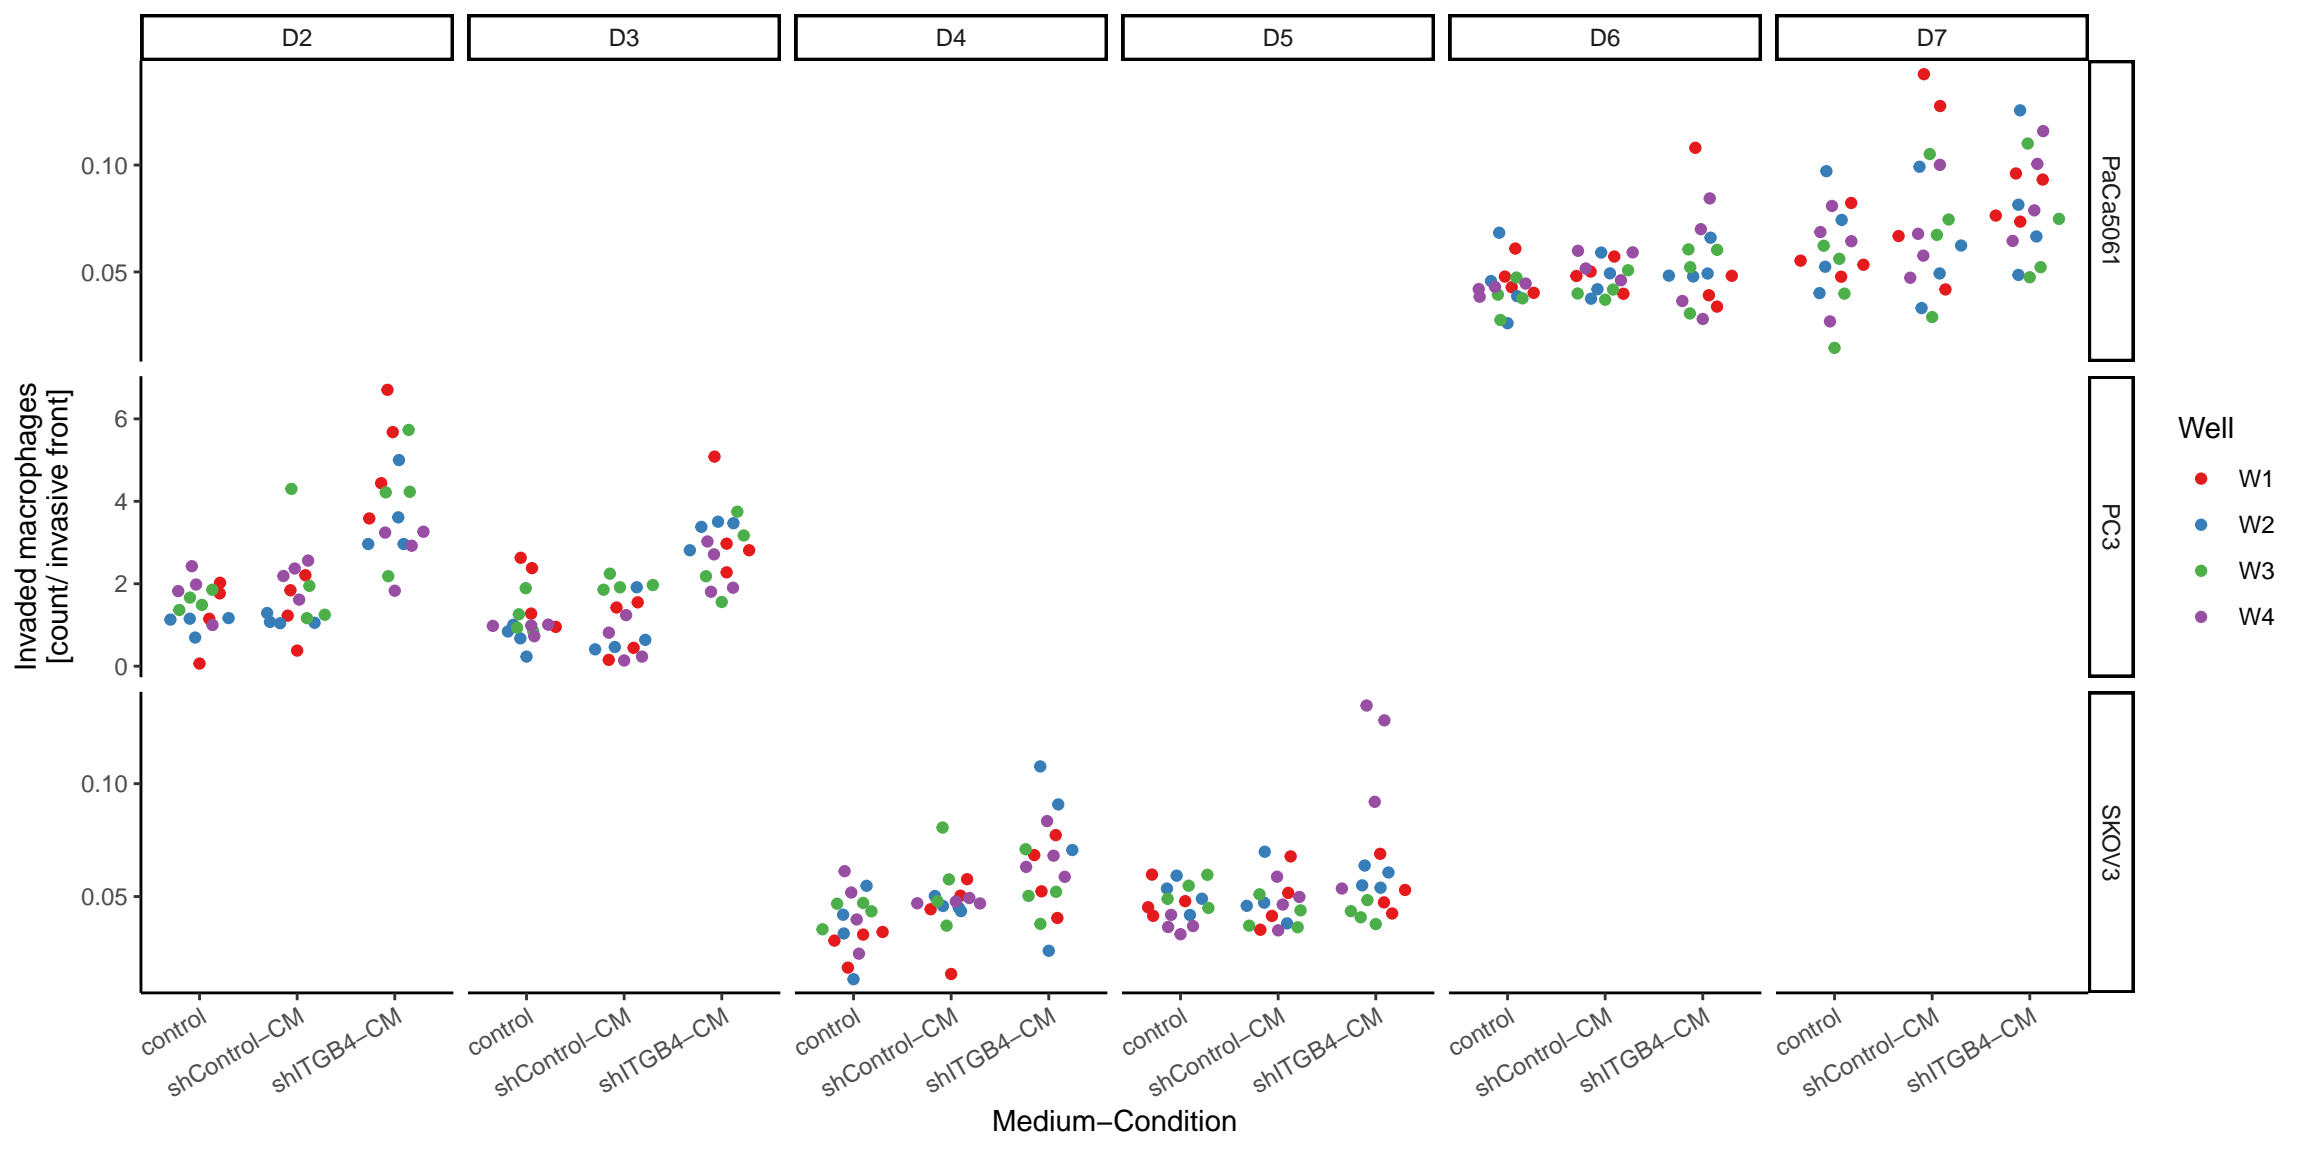

Supplement: 13045_2023_1413_MOESM5_ESM.pdf [file 13045_2023_1413_MOESM5_ESM.pdf]
